# Supplementary material for: Large‐scale distribution of microbial and viral populations in the South Atlantic Ocean
Source: PubMed Central journal article supplement (PMC4959534; doi:10.1111/1758-2229.12381), 2016-02-16

Figure.S1

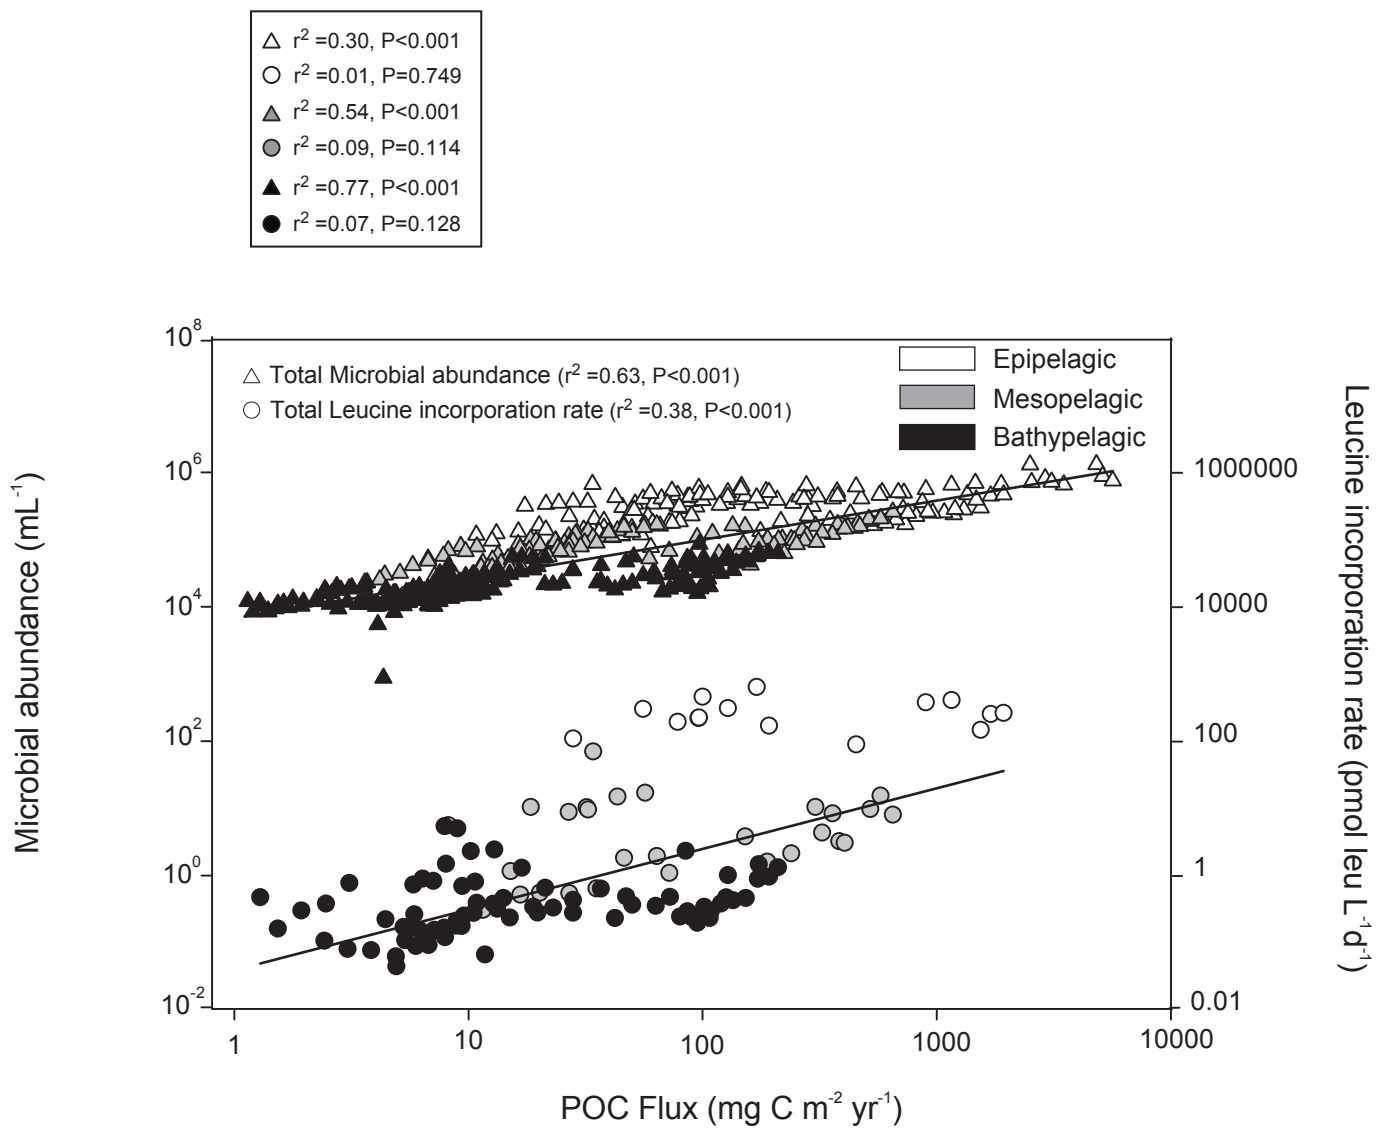

Supplement: EMI4-8-305-s001.pdf [file EMI4-8-305-s001.pdf]
